# Supplementary material for: Distinct mechanical behavior of HEK293 cells in adherent and suspended states
Source: PeerJ. 2015 Jul 30;3:e1131. doi: 10.7717/peerj.1131 (PMC4525692; doi:10.7717/peerj.1131)
Supplement: Figure S2 [file peerj-03-1131-s002.xlsx]

## Sheet: BAM_surface
Raw data of Young's modulus of BAM-cated surface at each point.
point-1	point-2	point-3	point-4	point-5	point-6	point-7	point-8	point-9	point-10	point-11	point-12	point-13	point-14	point-15	point-16	point-17	point-18	point-19	point-20
9700300	11589700	8209900	4564260	3707690	14357600	24769300	112050000	11199400	12316100	11577200	9097140	23708200	16792700	37397400	2051540	15170800	12864200	19321300	3555300
16209700	17277300	5542850	11346600	25985300	4606610	19718800	20544300	16771700	14550000	21198400	10592100	13240300	36219900	5181180	22911300	13601100	9194510	17712200	6247180
13188100	10683200	8792770	4436290	29522200	3657840	41484900	3281770	37500200	148412000	45262200	55817400	13267600	7301860	27814200	5170170	6073350	23686300	13713300	8754820
5120260	37135600	11526100	25143100	20440300	29073400	9142570	4575600	72083500	16843100	20629400	36988000	22044500	10048200	7168950	79835200	7399170	46916500	8954440	4421020
7155950	7786940	5000840	1634070	8056990	15623700	2882230	12206100	15396900	43211600	33687600	8888510	8315530	9993830	38291200	12633700	36153100	4701310	2444340	10773200
9698540	15035000	4400790	11969700	20262000	24470900	18914700	56117900	15884300	6323830	14772900	81251500	9470430	6013260	5836880	6093580	55608600	11737100	27946400	1732890
11732300	7464560	5985260	2009980	10913100	7951430	1300870	18691600	9667520	22248500	28561900	41146100	3815470	10958100	30593600	17281600	25968300	9748990	39058700	13241100
15037200	5982610	6446920	2544160	10987500	16405200	39138200	70444200	13809100	6236400	5352380	31715400	181810000	2937900	17787300	10589400	211678000	17235800	18791300	5367190
2673730	6232590	12013200	9948980	7949370	1539890	32742900	15180400	19979500	34225400	5992660	13153600	29497100	164010000	86805200	12355800	53309900	920300	7999490	6652680
5586350	13936800	10702200	21569300	13680100	75930500	27385200	18804500	26431100	2462200	12883800	31781200	16752800	10582300	2040860	32025200	6567250	5196560	48420500	17532400
5772980	5306550	2409290	17651500	16896300	14424300	2374970	3981200	28083100	9253110	2119770	26784800	2970140	34563000	3897450	36840000	6229130	9723510	17331800	3116670
9480940	3737520	6403400	1086080	4607510	8002150	1977190	10817200	5255900	6952310	35276700	24811600	24975500	6494080	9543860	7413600	21331000	39762900	6368970	36606200
2989090	4459580	8019910	19642500	8278230	1555370	22735000	13877200	26051800	11155300	13358400	6019460	9863530	15246600	32538200	1598900	3794640	6679840	13067000	11323500
6359910	7158350	15465400	12250700	4069210	11574700	4918630	30670900	5720490	2117830	6675700	11534100	19039300	5823540	98326200	9185100	39909600	16805300	18792300	19496800
9760260	15740000	2879270	9771600	22068900	8299550	6906870	21989700	14887000	2107000	24730200	19157100	34385500	1775070	40221000	23361300	10061500	8632790	10894900	2145350
4911350	16590400	27112700	15411300	29791800	21833100	9349370	11779600	1934130	8067760	19862600	2751150	30350500	15412100	8378260	30096300	3329450	16319900	9937330	17436800
7102390	18157800	4049670	3463910	24813700	35418100	18486700	12612100	7579940	14930400	22895000	28046500	28626600	20133100	14556200	37386700	347786000	5137560	6740230	37155700
7274690	9569960	20567900	24380100	22329500	16282200	16122400	18540200	31200700	18538300	3863780	8896130	4339770	13670800	16039400	19555000	30875500	8440670	40767300	3780620
11093100	10073600	4329460	10490800	7518270	9279470	11298300	9893300	13504200	36149600	112211000	28010900	3999400	34193200	85518900	851960	9131580	15731400	13194000	8710440
2380610	2380810	9886030	11708400	31955500	9605530	16979400	6276660	7423210	30635500	25272300	21347200	15310200	19907000	1199810	23579600	16374500	14791200	8502650	12623000
8382960	20443000	15199100	20271500	2311810	10982200	8617730	7483650	25704100	6140380	9068570	2328220	30039900	30388900	8082980	18672400	5481420	2444040	9266040	2300730
3555240	6798270	6551020	18797200	5965440	29049200	17099200	21350800	12631100	12942700	1789860	12997300	3565250	21210300	33285600	10119600	5554280	5051790	4485080	12378200
7311130	12642700	9983410	22731300	10304700	35519800	9628220	8368450	12819400	9127740	2218020	8916470	27638100	6520480	31925700	5738060	14158000	6676730	15972800	6583360
5197060	3927800	6575480	35148700	19270200	1284640	158273000	17024400	17871000	14301500	4623980	15026400	10107300	2552340	23071600	45464300	17071800	17249000	14909600	126268000
6332960	9948740	9375560	40023900	4741930	10930600	16958500	20436500	33079300	21137800	7240620	64305600	36020500	27903100	2981330	16757300	5677300	6390700	16479700	3687590

## Sheet: polystyrene
Raw data of Young's modulus of tissue culture polystyrene surface at each point.
point-1	point-2	point-3	point-4	point-5	point-6	point-7	point-8	point-9	point-10	point-11	point-12	point-13	point-14	point-15	point-16	point-17	point-18	point-19	point-20
84024700	153368000	60545100	6048240	6003180	5799260	15122000	3697420	6754340	35738500	8399880	4858410	6465080	4841880	7003310	5399140	8020470	8639090	8441440	3178560
11083100	49195200	4614940	8877290	5932080	4040230	5973830	9186510	7428130	14097100	2905490	3654460	4010980	6826630	6496210	9130370	7499360	22161300	2793280	5145960
21009700	22334400	20841500	11081700	6477570	5801220	6183570	3914590	7445360	7224780	3797690	10774700	5170870	19307000	5765880	3250790	3425210	5407330	5955780	8101140
20948100	6122970	9010060	56423200	5081130	7093030	13323500	5083250	6315820	5748950	3865710	7392870	6206920	5787660	6324490	4953820	3408850	4274420	8005040	4768400
20141900	16610000	9345760	14520200	10584100	11250100	5448190	8286110	9471900	6256950	5556350	3930920	7842540	9353260	9866260	3737950	5761930	3776650	9953480	5509100
40234100	13112000	12256300	4712070	10815300	11617200	8269350	5558580	10291400	26412000	7392750	5147860	3998000	102269000	12154400	4698730	3607350	30820300	4763480	7812680
23672100	20691600	514439000	9806670	21917500	9326530	5480140	12605800	10261300	6578720	14835600	4699960	3549640	6135900	5627220	4203880	3986730	4193550	10705700	7173510
102869000	42606200	14257000	12029700	9136210	5422530	10695100	5276790	4569150	26065900	5729200	3318830	4947940	9523940	30355800	11202400	8735420	4709890	4987150	5697980
12202700	7995350	26041400	18652500	27533400	15988800	12696400	7092240	4233750	8248890	4157670	5364940	7526190	7620740	8084160	5331730	3196350	4558270	5416340	10264200
16543700	13374700	9895260	130205000	4667550	7067670	8933680	11202000	7367710	3962290	5245520	11046200	10165800	8584770	4641650	6230720	4787830	6680490	9780570	4823170
10075800	10314100	6893120	9511410	18763000	40481400	9930440	12771300	4927280	25529200	8891150	7593390	5154290	9506020	66110100	3925890	4357910	11260800	4727140	12943100
5327490	37993900	73426400	10020200	55009100	8800140	18344100	5032350	10158000	25311400	6247770	17169000	8320980	7144760	20344700	8644360	6181960	4879090	137995000	7341630
17076500	13363800	13347400	5618880	24855100	14013300	20639700	5903870	18053800	8734540	8063500	93621200	11366300	16615800	5625060	5422400	10496400	11536700	4886370	64356800
22719400	29225200	13052500	10141100	3786930	13245600	12328300	49914300	8587770	10833200	7826000	19014500	8841990	23290000	11857700	10176000	8511340	6429710	5509690	25244000
10804500	21575500	22935600	36258300	12566600	9447980	10798600	19987700	7944190	11564600	6010010	8658490	5051640	6896840	12421700	157458000	6930470	8182620	13867400	21411800
99434700	15297100	31124800	6160190	8255210	15183500	7779710	22579800	11300600	27125500	13351200	12913500	8732230	110747000	6150830	19344600	10240700	10236600	32804400	7481660
1693800000	31659200	130968000	26621100	8320710	39840000	9857360	11232100	13621100	16025000	72294400	8950390	8986910	13699400	12322200	12087300	4774320	3766460	14830000	4388280
23108100	68982000	13158400	19828200	7846760	10620200	51894200	6728990	41007600	23093900	237297000	13297600	5832690	11273800	34678800	13767900	3675460	10520600	15562200	14931700
40649400	26625100	12114700	19837400	12035300	18838500	13983900	10599700	22679900	27798800	6526740	16354200	17199200	32804500	15101800	3516210	4390770	8577540	8785250	7350540
99719400	104145000	32906500	11434100	8248360	13161700	16375100	8844350	36032800	14271700	17246600	7383820	15342500	8962540	111279000	6438450	5892350	8801620	5271240	5756700
56043700	12169000	33707900	23563300	14845300	13464600	7779850	25284000	9608240	22625300	5632890	29089300	20337700	7557410	9687570	8143660	11351200	13693900	4783610	5819710
6379790	11821300	49427600	71207000	5511910	51709000	23505800	19235000	12070000	9008430	23217000	9688440	24325200	11851800	5200240	10157300	5135980	4962320	8622790	84338600
103956000	21866100	55601600	69117100	75260100	17566300	5971400	15748800	14898900	10462500	10031200	28882900	9195280	66457600	6602680	3750430	5848070	7596490	6663700	4011050
21360800	10154100	28456700	92623000	17135800	10395300	13205500	8521940	7249410	16398700	7854710	18519900	11814600	12119000	5092410	7465080	14251800	15878500	4942900	5408280
72517000	46633400	414650000	28362200	5650600	6001650	21495400	29345500	6391860	15924400	11827200	8671010	4826740	13825800	7389230	4742720	7252300	4266270	9604600	5857440
