# Supplementary material for: Distinct mechanical behavior of HEK293 cells in adherent and suspended states
Source: PeerJ. 2015 Jul 30;3:e1131. doi: 10.7717/peerj.1131 (PMC4525692; doi:10.7717/peerj.1131)
Supplement: Figure S3 — Raw data of Young’s modulus of HEK293 cells on normal culture surface and BAM-coated surface. The cells were treated with or without cytochalasin D. [file peerj-03-1131-s003.xlsx]

## Sheet: adherent-ctrl
Raw data of Young's modulus of adhered HEK293 cells.
cell-01	cell-02	cell-03	cell-04	cell-05	cell-06	cell-07	cell-08	cell-09	cell-10	cell-11	cell-12	cell-13	cell-14	cell-15	cell-16	cell-17	cell-18	cell-19	cell-20	cell-01	cell-02	cell-03	cell-04	cell-05	cell-06	cell-07	cell-08	cell-09	cell-10	cell-11	cell-12	cell-13	cell-14	cell-15	cell-16	cell-17	cell-18	cell-19	cell-01	cell-02	cell-03	cell-04	cell-05	cell-06	cell-07	cell-08	cell-09	cell-10	cell-11
133.172	101.412	42.0791	109.747	87.7244	66.5593	208.434	62.3462	62.9265	107.252	231.807	474.138	182.015	41.0498	220.04	637.609	551.467	792.494	450.631	247.733	207.518	124.874	122.007	47.7941	169.261	145.051	278.231	258.294	143.675	127.894	185.883	115.451	185.451	179.949	140.756	85.9959	108.16	106.482	118.705	966.968	135.924	257.824	855.101	206.322	259.364	217.36	239.378	648.682	160.594	130.94
81.8926	4.91071	70.8416	159.517	44.3962	76.6125	202.059	127.753	63.6008	79.1451	326.999	318.1	113.619	98.3762	198.731	641.414	460.866	650.711	644.007	177.06	270.294	96.4151	196.801	95.1042	176.21	153.467	269.293	252.706	121.976	183.96	179.907	179.333	246.673	202.614	149.727	103.621	144.799	134.676	118.277	353.769	272.741	523.28	665.727	234.857	341.749	244.289	257.271	420.644	153.742	165.055
85.1281	155.873	60.9272	127.46	71.5468	87.9575	377.602	82.0107	120.165	49.7649	255.853	285.208	367.551	56.4421	236.887	721.476	715.082	743.547	707.913	145.529	231.243	97.8641	238.199	75.3855	184.881	136.454	254.633	302.191	127.921	171.968	170.951	173.974	220.789	203.542	113.516	111.3	137.343	139.309	145.967	148.344	334.44	806.273	583.81	252.236	296.444	107.556	248.526	295.864	224.022	181.645
104.073	37.6895	50.8024	107.334	141.319	107.819	198.19	109.698	95.8371	99.3625	87.1706	195.847	131.468	96.2271	172.759	470.521	368.508	577.515	986.78	163.864	122.083	97.5065	153.358	98.3989	188.626	112.614	214.297	149.345	104.016	179.878	158.753	172.306	214.149	192.438	131.44	102.559	144.819	118.127	150.843	174.061	326.769	851.559	567.108	263.191	783.237	417.145	266.374	437.372	162.206	165.369
68.468	71.1267	51.8989	100.004	152.44	55.8423	253.516	86.9325	100.395	68.1296	257.636	90.2174	137.765	84.1519	37.8748	254.869	652.922	452.45	427.739	190.101	311.167	98.0864	265.589	105.513	186.938	121.165	241.526	174.828	134.02	159.816	176.334	156.26	222.221	198.739	112.329	101.034	131.022	118.321	143.952	227.726	387.923	848.938	627.009	260.307	881.507	436.615	285.143	427.439	177.56	267.033
119.268	88.8017	48.9647	75.2303	245.237	32.0168	206.702	109.126	122.218	54.7745	133.789	418.652	187.56	206.597	148.049	223.47	494.843	745.416	607.191	523.717	156.751	154.398	223.102	113.88	214.022	175.116	181.805	123.961	94.0018	160.789	190.594	151.015	263.198	246.74	132.444	112.097	135.79	134.664	147.464	205.337	342.455	895.671	528.079	278.748	163.786	621.873	271.686	1315.42	209.793	176.972
85.6605	102.928	36.7675	129.048	136.534	59.0307	270.517	87.2381	213.507	72.4861	205.869	265.691	178.71	408.508	204.375	173.25	887.597	779.698	311.538	418.496	106.866	108.24	238.437	102.481	202.027	151.729	240.266	226.168	110.163	162.571	200.011	136.836	245.751	236.751	148.165	123.826	128.185	142.73	160.268	341.715	377.193	551.868	642.925	311.954	283.61	301.031	288.652	688.257	192.361	110.729
104.696	69.7298	39.1817	95.1923	162.753	70.9833	257.536	99.9288	170.806	98.7787	188.905	337.358	51.331	538.668	245.819	263.548	931.757	528.243	331.223	243.676	57.7289	79.0951	229.017	91.4179	205.414	126	220.263	185.947	133.646	170.329	195.044	160.4	251.409	194.953	137.449	132.515	137.529	122.411	161.755	362.6	407.314	553.893	695.979	294.927	116.392	216.608	278.603	578.55	141.844	105.114
87.1004	94.4555	65.7578	75.5366	87.5797	48.4633	296.291	136.666	161.675	62.9542	180.574	208.221	504.45	100.031	206.706	75.1276	383.651	363.936	574.897	494.029	89.2056	128.359	215.694	86.6418	183.756	107.86	261.375	163.083	112.649	162.855	189.761	135.103	240.485	249.477	149.087	117.524	137.114	132.55	158.48	470.299	375.217	333.52	851.329	255.564	179.279	321.484	261.027	857.338	175.504	111.324
92.1119	56.8477	66.8152	88.0919	92.7347	48.5443	58.1516	151.922	92.2523	30.6489	301.976	225.251	343.882	342.713	203.007	17.2421	553.022	437.758	1456.46	323.175	382.693	153.303	212.576	87	186.304	128.552	233.495	256.48	167.852	158.637	147.635	143.829	245.719	271.55	199.108	125.962	128.418	134.144	157.471	554.129	386.555	517.267	890.173	204.713	274.569	434.938	284.498	1115.68	187.966	86.5935
77.9046	37.4028	94.2282	78.9844	67.0458	62.6823	187.01	16.4568	93.8267	120.03	182.421	283.092	139.015	426.974	217.233	45.8693	1075.37	1709.17	1788.07	765.214	266.615	109.498	197.618	89.5097	208.81	129.586	237.791	160.892	120.029	160.975	183.602	124.172	229.387	284.465	188.814	119.411	137.066	131.658	167.547	594.281	391.328	648.281	840.79	186.381	236.691	460.221	260.012	1203.65	173.627	54.4752
81.4699	55.3912	68.3368	95.843	64.8796	86.1543	82.0907	112.51	108.101	75.4522	272.478	725.807	19.2025	628.675	240.466	13.6527	376.475	951.964	394.025	453.366	316.376	109.33	208.23	151.657	235.503	158.492	212.911	108.752	174.418	158.485	166.516	131.867	232.393	243.561	204.251	120.171	138.51	135.856	182.098	551.546	410.756	571.762	651.138	212.969	264.009	397.779	259.15	1192.42	209.392	105.747
66.7501	86.8584	70.3142	96.3342	31.7064	43.0414	271.385	102.175	81.7271	145.823	191.737	331.308	324.642	362.411	209.12	224.382	593.628	36.1265	278.94	383.423	381.95	122.609	173.758	158.277	236.432	144.048	240.858	179.712	186.531	167.268	160.323	127.684	213.15	248.533	153.489	114.996	143.618	138.495	175.589	155.948	285.951	573.918	626.649	265.446	260.969	442.951	289.892	189.58	208.744	108.58
37.8258	100.154	57.7317	57.3847	86.3618	100.288	212.172	153.09	136.738	196.926	140.809	294.39	257.902	453.645	237.184	173.156	406.18	1058.26	245.325	242.724	369.774	123.083	156.89	167.106	62.8778	161.318	248.201	172.92	187.922	154.491	165.666	164.176	238.797	240.747	150.124	122.35	140.459	131.192	161.094	330.821	332.5	524.376	680.803	317.136	193.901	386.906	284.168	1033.57	264.205	128.923
60.6171	169.776	57.2375	53.8707	123.445	92.059	376.07	145.239	117.906	100.602	155.883	329.787	215.143	94.9182	349.777	202.366	331.948	1356.93	454.869	268.781	327.045	127.853	115.597	156.709	72.9813	174.263	263.954	179.246	145.249	165	182.011	142.422	232.506	247.594	103.109	118.897	154.981	141.103	174.302	30.0185	686.707	532.633	654.246	343.661	158.915	509.542	296.312	485.978	292.324	134.713
72.435	37.1758	58.6283	88.691	72.7466	156.266	79.965	99.209	84.9337	84.6043	185.049	347.82	82.7879	381.27	145.086	203.323	365.903	1633.91	317.978	412.408	259.52	142.023	232.5	179.374	76.3329	167.206	208.563	150.912	136.644	162.396	184.396	148.345	276.676	247.734	122.265	139.081	134.641	140.798	160.65	89.1605	489.983	667.329	601.773	352.76	271.299	412.903	279.465	403.203	359.629	145.462
71.4876	122.928	60.8636	59.762	51.9267	110.573	194.251	133.301	139.971	45.5703	213.56	202.42	76.6091	435.355	190.139	21.7912	1162.71	2047.17	545.423	434.609	297.562	140.178	87.7952	158.733	84.9996	167.445	237.009	176.559	272.733	162.068	178.328	132.661	256.434	272.289	191.709	145.737	138.275	144.681	173.572	36.0766	406.579	752.029	707.294	320.959	254.774	373.297	277.247	143.242	286.101	128.741
77.5599	99.9997	65.4253	69.4304	41.7378	53.9349	59.3891	149.117	107.474	48.858	220.469	201.416	630.576	395.124	69.0468	331.541	580.678	2090.86	472.667	217.262	198.708	169.525	200.818	133.049	75.9319	170.867	238.011	252.208	160.64	159.231	161.507	149.612	246.446	237.523	199.623	146.046	139.988	135.142	158.184	527.202	382.302	669.269	676.925	327.874	276.796	315.646	280.173	499.773	260.851	153.7
61.7568	111.053	45.5787	84.2466	69.8683	42.4289	112.055	96.9657	96.3455	61.8821	202.586	340.829	234.266	402.758	156.567	3.38857	1010.55	950.767	735.118	397.132	241.53	401.462	142.214	132.821	94.4542	117.211	205.879	298.966	148.049	155.079	147.434	155.898	226.297	206.398	138.929	132.921	134.486	136.46	162.538	559.885	404.197	566.527	753.676	289.273	448.01	358.372	269.453	261.897	193.491	150.546
85.2203	73.4045	57.8352	86.6006	86.1973	65.7603	109.485	79.608	150.227	69.7752	213.147	353.742	344.84	292.444	253.936	16.463	406.581	1549.86	593.655	738.406	283.488	176.712	275.833	152.401	82.9156	152.216	114.899	178.539	150.642	157.577	74.7297	137.855	191.59	221.676	120.287	124.666	134.064	148.782	154.46	817.203	426.719	427.556	804.553	288.672	427.612	463.831	292.691	384.81	195.914	118.793
82.481	95.6953	70.7629	48.191	68.331	75.4573	86.9286	142.772	165.641	60.0585	323.975	424.8	117.94	581.637	211.258	306.488	1176.56	1902.34	1289.23	543.481	309.958	153.999	210.461	136.578	90.8593	177.074	170.811	92.7085	198.787	149.199	158.328	145.037	235.213	231.32	210.268	139.12	140.444	143.276	138.48	647.562	418.645	459.089	674.156	283.716	598.766	378.788	277.324	126.954	196.078	132.52
69.2579	94.4046	79.6085	43.9696	84.9026	71.8244	92.3662	89.3599	127.791	90.4234	145.66	666.048	79.7117	554.166	200.953	22.2276	1144.55	1631.48	1209.26	396.356	197.96	195.02	148.192	136.378	121.419	184.358	165.11	194.435	175.154	139.897	147.587	161.22	246.638	217.86	205.249	145.499	129.117	146.145	168.228	495.483	424.727	482.956	562.753	315.543	364.68	380.351	293.616	379.996	221.621	156.052
87.0572	140.445	66.0191	54.8959	69.6682	64.5962	109.048	133.608	130.851	84.2251	227.348	992.144	311.672	471.056	237.252	237.195	627.64	786.321	564.604	253.582	231.92	119.663	116.443	157.531	98.1705	150.613	225.051	344.4	181.402	138.01	155.785	154.124	262.786	226.751	140.184	140.864	124.698	146.468	174.335	629.911	368.988	472.967	466.533	345.6	267.425	249.484	296.733	350.913	243.183	154.663
75.1371	49.2418	67.7899	107.477	15.3741	70.7904	104.697	187.457	144.199	105.608	153.128	277.051	90.0313	407.352	203.812	520.321	416.302	318.95	1193.75	206.098	204.321	206.098	121.259	145.106	98.6278	142.038	267.897	174.736	174.561	138.712	164.337	150.271	214.025	155.751	157.808	139.551	124.324	143.169	160.574	359.13	332.323	424.037	717.484	364.347	253.28	520.549	274.578	336.409	258.806	162.655
17.9122	203.441	67.0568	40.3242	76.844	106.854	160.341	115.175	247.406	122.171	136.925	280.643	58.0855	821.043	249.402	0.0964867	601.371		1032.14	321.003	354.853	190.626	143.748	137.286	189.27	191.779	229.971	106.624	166.814	144.245	160.964	152.347	258.6	168.215	161.517	130.054	127.503	138.387	172.747	507.832	312.013	357.073	623.043	364.944	258.348	511.098	271.212	265.759	331.805	194.268
[truncated: 9 more columns]

## Sheet: adherent-cytochalasin
Raw data of Young's modulus of adhered HEK293 cells treated with cytochalasin D.
cell-01	cell-02	cell-03	cell-04	cell-05	cell-06	cell-07	cell-08	cell-09	cell-10	cell-11	cell-12	cell-13	cell-14	cell-15	cell-16	cell-17	cell-18	cell-19	cell-20
389.47	132.167	354.326	190.561	107.934	351.159	115.737	383.746	145.857	64.2949	55.4008	355.053	122.223	1025.79	176.933	105.082	60.4011	243.01	92.7783	201.449
90.2397	337.871	297.232	404.944	103.214	393.778	159.578	520.63	242.81	103.196	86.8548	296.738	85.3187	832.537	169.425	239.072	59.2248	251.623	68.4069	95.2684
130.937	557.932	302.969	280.704	97.7002	203.704	309.824	850.964	260.031	196.264	70.3148	372.612	200.298	388.698	84.2505	334.552	135.148	230.774	47.0958	78.434
272.68	314.918	321.976	292.092	87.6419	211.396	284.25	716.07	194.16	97.6022	79.5047	160.128	178.842	331.436	207.004	341.552	115.42	437.578	78.7291	57.7501
143.17	435.404	358.123	260.13	127.952	212.803	255.196	573.75	95.9573	146.001	48.0419	264.261	192.578	89.282	241.673	250.018	104.643	496.294	32.0654	69.8376
296.755	426.936	403.964	314.882	200.257	139.412	149.335	674.612	148.002	130.922	102.981	343.867	244.154	564.786	289.905	222.617	79.6591	412.196	63.7397	114.293
418.312	323.799	308.257	263.782	173.994	122.059	113.004	972.982	211.762	100.644	59.6557	224.995	306.629	449.152	193.971	319.815	74.1163	497.721	51.1063	105.256
504.901	340.605	236.519	428.418	422.574	241.001	130.431	781.81	165.341	115.366	76.2427	448.848	232.769	302.608	94.7881	428.027	79.3466	431.419	50.3283	147.482
251.607	279.276	169.062	539.271	269.987	218.427	577.386	522.323	173.184	171.019	93.0611	277.627	239.905	249.791	170.991	180.117	288.607	445.539	59.3056	109.223
331.077	326.81	115.51	244.137	89.9807	200.102	418.382	390.373	146.054	117.627	160.148	176.451	191.197	370.923	221.264	301.553	233.996	457.836	52.6671	179.847
531.949	339.135	309.329	360.412	104.273	77.0262	138.409	475.684	681.657	258.672	112.77	339.343	183.04	387.592	276.297	297.046	57.9871	384.037	134.876	273.738
798.918	145.285	201.755	188.524	163.124	131.511	196.955	379.411	220.934	82.0729	68.5511	196.714	146.001	551.023	190.253	350.639	62.3603	745.985	102.756	179.201
610.844	216.436	288.084	604.782	230.417	79.1877	704.38	281.247	307.234	135.775	50.9674	650.227	235.238	829.332	263.974	304.172	42.5192	975.516	42.9082	197.004
471.745	76.9675	329.338	254.023	164.311	117.032	290.822	446.327	245.579	144.417	255.753	443.564	490.454	218.546	126.312	372.039	272.374	772.002	189.335	196.945
263.865	314.32	285.665	360.094	135.152	78.1197	255.103	618.245	248.866	131.456	262.914	233.703	283.101	314.641	165.49	413.502	345.048	964.384	110.918	142.949
770.118	222.917	382.1	402.439	176.475	132.43	91.978	866.44	174.157	130.744	137.835	335.695	557.376	226.901	185.548	426.355	76.3608	199.271	192.538	200.945
229.236	727.01	350.085	576.133	181.17	97.7913	293.083	756.635	272.513	113.061	205.953	369.59	207.252	194.559	151.994	234.794	62.5046	450.79	77.1844	116.954
210.539	435	168.872	428.659	219.411	115.219	331.435	426.66	397.184	92.6668	147.662	262.354	121.082	133.434	103.79	300.633	92.0073	452.234	63.0915	121.069
157.92	117.548	264.79	199.161	162.855	75.6973	763.363	511.563	100.024	116.508	104.626	199.503	261.23	280.846	89.601	434.769	97.9642	470.132	161.169	202.848
214.983	86.3055	475.677	271.464	133.289	133.734	474.147	417.495	311.912	239.139	125.275	177.198	490.766	203.903	115.008	423.648	179.597	337.981	152.622	110.192
230.685	72.7222	270.383	218.098	317.067	138.555	635.806	419.674	522.556	89.7418	98.7792	207.229	423.168	233.905	127.343	266.283	53.9684	204.895	74.3353	125.869
109.088	120.426	195.749	390.855	351.223	108.467	531.932	424.631	158.189	132.23	106.084	101.994	628.772	185.591	222.038	246.904	286.351	295.764	82.9617	111.066
973.44	148.291	308.826	383.189	388.135	63.7756	536.579	224.842	115.41	183.519	94.8387	893.645	791.075	170.083	134.129	149.575	250.37	507.403	165.234	81.9282
200.604	289.672	220.347	297.837	311.423	140.127	551.763	243.818	158.969	79.2088	126.764	292.055	752.852	283.611	104.747	582.033	300.321	480.834	120.908	113.507
236.075	279.297	253.684	163.992	379.926	227.609	143.676	274.41	141.435	219.817	202.214	511.573	683.086	255.407	122.398	530.067	262.451	427.165	155.26	164.68

## Sheet: BAM-ctrl
Raw data of Young's modulus of suspended HEK293 cells.
cell-01	cell-02	cell-03	cell-04	cell-05	cell-06	cell-07	cell-08	cell-09	cell-10	cell-11	cell-12	cell-13	cell-14	cell-15	cell-16	cell-17	cell-18	cell-19	cell-20	cell-01	cell-02	cell-03	cell-04	cell-05	cell-06	cell-07	cell-08	cell-09	cell-10	cell-11	cell-12	cell-13	cell-14	cell-15	cell-16	cell-17	cell-18	cell-19	cell-20	cell-01	cell-02	cell-03	cell-04	cell-05	cell-06	cell-07	cell-08	cell-09	cell-10
749.683	1227.22	1107.45	697.109	3646.33	1842.32	564.554	758.38	386.496	489.05	228.131	948.137	3697.48	604.184	708.404	395.983	204.573	428.761	235.555	456.303	2356.51	2824.08	678.271	1091.98	3033.08	1742.51	802.768	1616.7	396.706	1930.32	130.17	923.4	398.448	518.708	466.875	376.904	1788.83	369.907	1127.95	539.58	454.304	407.483	698.087	682.7	1335.17	501.023	685.452	871.758	1277.54	681.406
732.677	753.265	1417.2	795.527	2117.92	1831.65	1021.46	651.226	423.446	458.35	162.718	1576.02	2908.28	1952.99	646.575	537.066	227.033	677.071	243.872	535.059	3484.71	2246.68	1885.59	3511.54	2577.61	2541.38	1339.71	1789.19	536.152	2600.9	1384.05	1658.31	578.044	591.185	901.846	515.714	1293.52	421.049	1232.11	1318.22	442.21	684.783	698.327	778.781	1121.11	359.834	589.778	577.162	1420.99	717.41
551.07	789.679	1114.79	877.652	1031.88	2185.99	950.195	747.044	530.042	456.925	190.558	1425.65	2183.7	1366.4	857.288	632.538	247.803	819.407	217.874	507.585	4649.91	3034.74	2021.73	3776.88	3034.95	2586.47	971.081	1725.58	458.11	1596.26	1417.79	1663.03	542.855	573.925	903.433	383.061	1641.27	454.491	1141	977.663	651.85	542.051	971.839	810.733	1351.56	426.06	607.468	600.142	1456.79	601.655
1035.95	961.875	858.468	1086.01	1005.45	1366.05	1143.49	785.611	504.495	377.115	160.617	1964.98	2843.23	1246.01	721.766	626.798	224.434	586.252	262.591	508.591	3526.8	4254.64	2692.1	3068.41	2513.97	2481.22	1074.51	1325.29	511.794	1623.4	1088.91	3332.25	534.556	550.959	716.959	431.539	1201.84	379.006	879.682	962.673	796.69	1299.1	791.667	1315.05	1169.29	428.464	768.425	689.112	1364.11	565.038
2052.12	1150.32	786.889	567.464	1231.49	2215.14	1571.65	544.196	644.051	369.471	192.049	1377.36	3712.68	203.471	663.527	462.201	211.808	717.213	270.453	553.684	5397.49	3063.45	2577.95	2912.55	2537.5	1739.92	1195.3	863.339	514.395	1195.22	1073.35	1994.82	586.499	570.876	837.971	413.768	1430.55	349.756	1126.27	1076.94	835.2	922.107	946.551	1528.51	853.415	459.108	518.043	766.949	1608.1	596.707
1970.3	1250.26	1461.53	538.33	1263.4	2217.47	1808.98	826.003	463.623	533.987	296.233	885.488	3812.42	1298.53	715.293	520.134	216.179	693.399	285.849	680.206	3385.27	2971.57	2290.32	4013	3701.96	1694.02	1202.49	962.463	511.525	970.504	1201.24	1995.2	645.829	477.926	880.245	257.593	1722.44	467.649	1194.21	1003.09	612.587	677.273	1047.74	1234.02	910.985	456.45	1022.87	716.825	1517.64	796.044
1009.1	949.429	1331.77	557.991	1417.65	1870.21	1713.12	617.101	485.12	521.126	286.72	1098.58	3256.33	1887	663.587	612.601	259.035	604.7	326.552	669.098	1809.65	5789.23	2738.85	2770.37	2285.01	2106.68	1187.91	1989.58	519.444	1236.8	1594.48	2392.24	603.506	539.496	685.781	396.58	2374.64	278.893	1400.14	1095.46	665.628	521.592	1033.09	1625.77	765.611	518.472	855.058	646.401	1435.21	618.225
629.901	781.888	758.867	517.988	1294.04	1488.79	1832.35	533.955	465.573	506.711	178.114	1710.53	2705.05	1358.79	716.309	694.542	231.646	621.235	331.578	545.527	2245.14	5231.48	2075.55	3654.47	3203.58	2404.78	997.899	2311.84	461.034	1804.72	855.514	2231.69	447.159	534.687	898.211	427.211	1449.79	577.074	1153.77	1175.89	777.635	992.484	953.087	1397.56	913.131	484.94	611.613	622.139	1106.64	856.359
622.267	2444.63	987.158	607.492	1283.99	1693.79	1989.88	464.69	526.757	586.453	234.114	1018.58	2857.55	1626.67	806.057	665.808	200.38	544.274	344.417	567.672	2223.69	4581.2	1570.62	3104.83	2514.8	3162.53	1238.64	2153.97	461.069	1556.79	2285.64	2654.44	563.613	598.761	658.667	472.61	2274.34	451.486	1481.17	1453.8	1015.51	548.515	804.292	851.363	1151.28	550.107	553.514	714.012	1144.34	709.674
333.842	991.784	2059.7	564.965	1304.17	1460.74	1894.9	754.701	395.061	673.861	230.235	828.727	3785.18	1194.25	828.618	637.024	212.544	500.355	312.176	740.249	3032.65	3004.57	1439.1	3679.94	2411.43	1670.07	1144.4	1619.45	548.401	1797.49	2302.88	1502.17	465.199	537.619	1197.93	406.694	1515.55	641.549	1454.35	1267.12	882.212	687.784	994.974	594.05	1105.81	477.409	397.959	675.581	1269.83	856.518
1072.52	1292.99	1378.76	765.154	1804.85	2750.68	1862.05	741.454	401.221	571.005	251.763	1312.46	4122.85	1216.01	673.65	658.44	224.038	691.881	341.866	589.47	3749.88	3253.14	1854.07	2837.74	2809.06	2025.3	724.303	2182.28	654.981	3079.34	2755.68	2685.41	450.509	394.251	1038.74	379.772	2060.78	846.712	1570.23	1154.66	1043.86	804.94	990.917	480.464	553.335	608.297	580.508	736.163	939.775	822.979
665.688	863.346	502.965	642.392	1219.59	2603.15	1926.83	686.472	605.005	651.265	251.256	998.499	2944.72	1594.21	560.283	694.304	239.085	737.21	467.5	597.702	2109.27	2948.88	2107.88	1366.71	2892.34	1827.65	1238.63	2184.8	658.353	1866.71	3465.39	3511.35	606.189	620.503	865.631	368.839	1970.57	537.771	1412.96	1412.51	518.779	891.391	895.685	1121.55	421.947	586.809	683.592	683.781	1194.17	936.047
754.54	264.757	1065.78	601.579	895.02	2420.18	2107.92	571.563	395.739	590.226	268.063	900.492	2555.12	1128.19	727.412	630.703	212.347	720.028	362.762	776.535	1447.66	2661.65	2245.1	2647.32	2510.62	1894.29	1202.4	3205.02	711.906	2932.53	1416.82	2835.62	586.666	656.547	898.684	350.795	1136.7	427.104	1708.53	906.206	730.824	812.537	587.64	1610.91	638.1	692.646	689.924	826.506	946.463	735.335
748.731	547.1	485.611	485.364	999.731	817.245	1717.48	639.654	296.198	516.529	228.615	989.492	3458.38	1068.61	824.423	665.638	224.465	671.438	324.528	809.537	2188.21	2294.92	1764.9	3180.13	3074.01	2093.65	1078.01	3102.52	597.001	1445.32	1441.88	2242.22	657.971	633.889	793.375	382.858	1785.09	302.487	1389.38	882.911	919.813	640.479	860.874	1243.64	745.997	446.88	1275.58	870.109	1044.72	855.779
1075.2	459.209	706.572	539.623	942.405	2641.91	1776.87	744.322	245.626	623.75	308.822	1197.06	3114.65	1171.39	1020.07	655.04	228.858	775.6	298.477	649.881	3336.77	2388.89	2075.5	3920.34	3589.77	1598.09	1235.41	1067.72	557.423	1424.06	1610.8	1589.58	1153.9	636.551	1101.87	401.272	1340.55	375.647	1116.43	923.156	738.715	653.712	1171.63	1233.03	817.91	718.587	651.403	834.99	1372.26	876.292
581.27	562.858	1045.81	594.275	1081.71	2065.44	1833.55	774.905	234.338	556.438	207.655	1014.15	2175.29	687.233	959.166	593.556	235.324	708.683	330.541	626.603	2605.54	2517.58	1584.35	3201.23	4016.3	2054.02	1587.97	1741.18	577.78	1722.6	1577.77	3099.99	1049.19	596.151	997.068	404.711	1316.12	493.849	1532.33	1223.53	855.769	689.486	817.35	1873.65	321.302	735.277	537.576	765.273	1378.58	659.41
817.941	514.115	1072.96	621.009	936.697	2287.82	2108.85	603.019	354.359	539.209	263.378	973.327	2573.93	1145.97	856.435	526.507	246.9	655.677	378.136	964.374	2584.88	2414.45	1967.46	3540.87	3277.89	2890.8	1364.91	2222.31	581.771	1697.3	1145.26	3562.79	1006.67	539.624	1071.32	397.949	1114.29	365.697	1147.27	1075.83	781.601	593.271	809.246	884.573	811.271	769.236	559.616	1197.55	1313.66	630.921
1140.17	720.563	1413.77	827.086	1051.77	1314.61	2792.89	721.212	351.808	239.856	285.749	1049.46	4687.25	1204.09	647.718	665.432	264.229	700.084	393.438	760.762	2299.32	2100.91	2241.28	2213.7	2808.18	2410.26	1219.33	1678.73	585.618	1873.22	1234.53	2755.44	521.618	741.73	1001.65	363.233	1549.34	315.342	1389.75	1341.66	918.58	995.534	914.045	1039.33	708.369	557.189	919.172	887.783	888.609	810.108
883.729	813.931	1596.36	541.15	759.819	2082.46	1801.55	476.8	350.735	731.162	322.94	885.227	5082.74	1011.46	823.134	458.592	268.253	748.976	390.722	582.904	2515.73	2843.47	1572.91	2289.6	2144.31	1543.91	1208.39	1593.42	721.655	2144.44	997.618	3754.22	683.866	596.496	1031.9	441.052	1635.67	355.484	1569.51	1371.31	799.438	578.1	1015.1	1020.95	622.434	464.889	543.978	695.592	881.383	755.988
1310.39	1037.54	1045.61	879.012	1629.88	2715.36	985.808	562.019	406.131	707.601	289.453	1256.47	6307.65	727.854	853.291	531.671	278.789	757.831	369.07	560.604	2001.42	2271.53	1534.53	2674.31	2730.88	2630.16	315.336	1818.12	706.913	1604.22	1256.27	3632.97	503.012	650.257	1103.1	437.295	1994.06	278.973	1967.27	1052.59	1126.16	660.793	1028.89	853.442	951.04	453.598	649.009	983.845	722.743	604.49
863.185	956.553	2065.06	1494.93	1316.02	2114.87	1039.35	678.899	477.524	1179.52	258.189	1279.91	3030.32	1227.43	919.438	545.094	312.116	804.516	417.124	415.914	2351.35	2272.76	1425.05	3496.11	3333.82	2578.52	1566.67	1423.92	769.664	2069.38	1228.06	1959.48	710.62	646.071	930.04	415.358	1635.17	402.117	2440.85	920.304	1080.38	958.082	1169.28	541.011	1124.55	552.716	1174.5	1213.14	646.719	1021.07
1056.6	698.262	1313.07	1458.65	1297.39	2753.86	1733.99	499.429	356.869	672.992	277.875	1069.82	5087.72	1046.3	1174.82	463.614	291.203	726.508	363.824	761.576	4620.82	2788.33	2023.79	2315.25	3875.56	2469.24	705.439	913.956	860.148	2358.7	1277.58	3741.47	595.859	670.661	1029.46	381.237	1185.47	311.035	1666.69	1586.56	951.766	602.725	1095.83	841.316	664.223	544.024	752.461	954.302	802.659	851.196
846.147	451.764	907.509	1470.22	767.934	2375.2	2262.42	472.809	324.71	1347.36	290.71	874.203	5687.21	1468.05	1079.39	514.822	280.833	785.263	305.67	674.591	3314.65	2978.91	2257	2459.05	3066.01	2610.64	1211.49	910.068	799.752	2643.37	1321.68	3708.04	935.064	551.812	1122.51	400.618	1208.63	361.656	1594.28	1366.22	1056.46	552.518	860.764	1159.67	609.658	660.595	700.396	887.644	978.432	911.388
515.636	1140.36	138.613	1035.05	547.639	2239.68	2499.4	631.626	364.224	990.478	318.505	936.731	4925.32	1202.74	840.257	628.935	253.761	921.009	300.068	737.374	2972.08	2135.66	2160.64	3866.74	3898.62	2358.34	1410.09	1331.82	608.931	2073.32	1394.84	905.144	1350.93	616.525	1240.89	401.657	1248.83	331.814	1404.56	1111.26	684.284	637.083	851.922	999.344	789.94	619.294	565.257	907.75	1153.65	470.241
692.299	962.454	832.851	1130.08	398.817	1424.29	2639.86	768.744	273.213	950.6	414.23	938.556	6088.24	514.03	1198.94	599.046	269.37	848.898	362.786	574.62	1856.86	2661.99	1655.26	3730.19	3677.54	2066.51	1505.36	1562.78	642.01	1456.89	1216.9	3593.48	794.511	546.128	1564.77	397.709	1442.4	322.45	1302.15	1154.48		425.216	844.79	1290.05	726.599	486.347	530.648	686.185	1474.58	949.335
[truncated: 10 more columns]

## Sheet: BAM-cytochalasin
Raw data of Young's modulus of suspended HEK293 cells treated with cytochalasin D.
cell-01	cell-02	cell-03	cell-04	cell-05	cell-06	cell-07	cell-08	cell-09	cell-10	cell-11	cell-12	cell-13	cell-14	cell-15	cell-16	cell-17	cell-18	cell-19	cell-20
321.944	542.282	76.3283	159.498	444.866	104.479	127.019	343.704	481.87	332.997	255.558	238.898	209.512	434.322	237.053	143.049	101.18	638.547	96.0933	131.057
397.432	515.002	109.575	129.294	505.575	139.322	116.465	260.885	376.306	258.943	228.272	287.926	256.038	309.686	166.028	63.5252	188.112	456.336	89.678	165.845
350.859	252.663	193.631	154.618	246.23	180.502	121.383	382.963	417.839	208.554	239.653	260.672	314.832	497.384	175.41	130.41	172.299	800.128	89.5778	133.763
211.368	517.861	154.449	157.987	254.316	104.037	133.455	387.898	416.862	223.671	134.981	268.613	343.732	456.817	414.548	67.659	201.526	606.587	70.3786	90.4632
217.673	340.774	94.1703	123.849	285.17	98.3908	187.795	554.679	506.389	427.593	231.102	172.639	423.884	464.273	265.099	111.396	139.139	631.655	37.0698	116.209
206.606	423.674	95.8092	206.15	440.691	115.092	181.079	342.044	504.715	301.698	243.911	182.449	496.76	489.833	338.54	178.904	126.552	438.748	36.0124	240.128
220.763	342.031	73.8836	105.802	743.465	177.774	143.964	74.8575	493.351	293.352	393.188	245.733	353.331	418.915	216.629	140.274	174.076	409.708	115.167	38.5355
227.182	321.464	88.3817	429.023	823.028	200.482	130.89	343.224	412.482	271.859	353.277	184.367	452.256	446.986	171.868	121.497	182.031	479.511	97.1107	112.49
139.766	288.503	126.899	305.257	808.125	470.825	191.208	492.395	390.319	262.387	286.414	246.698	326.663	336.6	259.911	189.312	124.332	294.358	90.4409	176.431
374.165	331.824	183.307	211.319	993.134	195.171	117.546	343.688	474.17	224.728	220.837	301.86	342.43	463.485	152.151	92.4699	172.513	265.029	81.1056	192.131
206.796	345.385	169.727	249.322	542.368	122.587	91.359	229.622	228.33	219.356	379.411	218.911	378.638	265.764	349.827	109.491	113.836	488.669	49.6311	186.129
346.94	346.114	147.745	257.918	480.108	204.539	73.0386	607.135	340.84	146.227	232.88	226.529	360.943	340.429	297.675	126.044	122.432	288.892	77.3218	130.214
358.673	392.54	137.322	329.375	607.348	227.77	89.743	395.718	301.305	249.461	199.866	210.308	324.472	374.403	251.284	104.409	122.491	246.826	58.3447	211.825
215.628	362.156	153.121	170.945	581.624	133.651	156.151	395.327	245.081	284.39	163.944	208.916	365.118	569.26	385.826	187.392	92.8144	297.799	59.3738	213.35
244.604	163.693	113.334	232.739	374.07	95.2782	117.556	224.949	293.779	321.229	209.165	225.651	342.559	436.881	247.456	121.858	88.0671	254.887	55.4802	233.044
242.507	419.94	111.95	201.024	378.853	74.8604	233.148	375.496	350.828	120.752	394.577	132.027	246.034	501.374	405.568	343.832	157.398	235.582	49.3248	206.903
288.431	405.469	149.956	254.178	333.426	121.699	152.866	381.988	488.399	160.263	367.173	221.517	297.972	344.84	473.336	383.671	166.644	294.589	95.3734	175.61
328.657	501.048	74.1	298.72	245.299	206.566	195.589	616.072	331.246	88.8946	271.696	202.333	336.055	617.946	752.637	279.954	101.375	281.854	77.7984	206.307
287.098	370.748	126.459	272.771	410.58	202.91	118.049	477.163	436.573	305.623	246.445	324.749	398.693	512.383	280.496	403.898	147.467	432.459	46.8796	188.667
326.21	429.444	204.73	247.586	355.17	174.09	132.576	456.112	262.649	160.054	237.409	231.926	251.673	704.047	408.468	296.96	152.192	213.156	51.9269	80.3044
308.87	310.224	128.461	115.824	794.21	80.8356	136.536	509.614	353.084	281.752	413.747	373.335	322.39	635.503	531.212	407.266	173.775	397.63	67.042	145.003
360.044	371.363	226.765	134.194	603.823	105.931	169.392	462.214	428.012	342.808	236.389	329.725	294.694	512.365	506.596	307.108	211.414	185.392	115.008	231.116
323.792	370.506	159.853	160.124	348.377	340.628	182.717	449.301	545.071	357.259	379.084	553.401	358.351	488.992	528.583	229.706	213.909	296.489	60.2232	68.7038
336.569	383.433	81.8507	143.749	567.649	159.175	137.287	290.533	205.944	271.029	373.334	309.208	312.557	530.06	387.706	190.264	192.736	273.503	111.46	196.83
277.075	282.539	216.605	278.818	351.178	194.964	103.708	613.935	354.133	310.171	312.616	356.164	343.422	535.738	281.325	265.934	206.323	307.232	87.0578	110.915
