# Supplementary material for: Distinct mechanical behavior of HEK293 cells in adherent and suspended states
Source: PeerJ. 2015 Jul 30;3:e1131. doi: 10.7717/peerj.1131 (PMC4525692; doi:10.7717/peerj.1131)
Supplement: Figure S4 — Raw data of Young’s modulus of HEK293 cells after treatment with Y27632 and calyculin A on normal culture surface and BAM-coated surface. [file peerj-03-1131-s004.xlsx]

## Sheet: adherent-Y-ctrl
Raw data of Young's modulus of adhered HEK293 cells. This is a control of Y27632 treatment.
cell-01	cell-02	cell-03	cell-04	cell-05	cell-06	cell-07	cell-08	cell-09	cell-10	cell-11	cell-12	cell-13	cell-14	cell-15	cell-16	cell-17	cell-18	cell-19	cell-20
133.172	101.412	42.0791	109.747	87.7244	66.5593	208.434	62.3462	62.9265	107.252	231.807	474.138	182.015	41.0498	220.04	637.609	551.467	792.494	450.631	247.733
81.8926	4.91071	70.8416	159.517	44.3962	76.6125	202.059	127.753	63.6008	79.1451	326.999	318.1	113.619	98.3762	198.731	641.414	460.866	650.711	644.007	177.06
85.1281	155.873	60.9272	127.46	71.5468	87.9575	377.602	82.0107	120.165	49.7649	255.853	285.208	367.551	56.4421	236.887	721.476	715.082	743.547	707.913	145.529
104.073	37.6895	50.8024	107.334	141.319	107.819	198.19	109.698	95.8371	99.3625	87.1706	195.847	131.468	96.2271	172.759	470.521	368.508	577.515	986.78	163.864
68.468	71.1267	51.8989	100.004	152.44	55.8423	253.516	86.9325	100.395	68.1296	257.636	90.2174	137.765	84.1519	37.8748	254.869	652.922	452.45	427.739	190.101
119.268	88.8017	48.9647	75.2303	245.237	32.0168	206.702	109.126	122.218	54.7745	133.789	418.652	187.56	206.597	148.049	223.47	494.843	745.416	607.191	523.717
85.6605	102.928	36.7675	129.048	136.534	59.0307	270.517	87.2381	213.507	72.4861	205.869	265.691	178.71	408.508	204.375	173.25	887.597	779.698	311.538	418.496
104.696	69.7298	39.1817	95.1923	162.753	70.9833	257.536	99.9288	170.806	98.7787	188.905	337.358	51.331	538.668	245.819	263.548	931.757	528.243	331.223	243.676
87.1004	94.4555	65.7578	75.5366	87.5797	48.4633	296.291	136.666	161.675	62.9542	180.574	208.221	504.45	100.031	206.706	75.1276	383.651	363.936	574.897	494.029
92.1119	56.8477	66.8152	88.0919	92.7347	48.5443	58.1516	151.922	92.2523	30.6489	301.976	225.251	343.882	342.713	203.007	17.2421	553.022	437.758	1456.46	323.175
77.9046	37.4028	94.2282	78.9844	67.0458	62.6823	187.01	16.4568	93.8267	120.03	182.421	283.092	139.015	426.974	217.233	45.8693	1075.37	1709.17	1788.07	765.214
81.4699	55.3912	68.3368	95.843	64.8796	86.1543	82.0907	112.51	108.101	75.4522	272.478	725.807	19.2025	628.675	240.466	13.6527	376.475	951.964	394.025	453.366
66.7501	86.8584	70.3142	96.3342	31.7064	43.0414	271.385	102.175	81.7271	145.823	191.737	331.308	324.642	362.411	209.12	224.382	593.628	36.1265	278.94	383.423
37.8258	100.154	57.7317	57.3847	86.3618	100.288	212.172	153.09	136.738	196.926	140.809	294.39	257.902	453.645	237.184	173.156	406.18	1058.26	245.325	242.724
60.6171	169.776	57.2375	53.8707	123.445	92.059	376.07	145.239	117.906	100.602	155.883	329.787	215.143	94.9182	349.777	202.366	331.948	1356.93	454.869	268.781
72.435	37.1758	58.6283	88.691	72.7466	156.266	79.965	99.209	84.9337	84.6043	185.049	347.82	82.7879	381.27	145.086	203.323	365.903	1633.91	317.978	412.408
71.4876	122.928	60.8636	59.762	51.9267	110.573	194.251	133.301	139.971	45.5703	213.56	202.42	76.6091	435.355	190.139	21.7912	1162.71	2047.17	545.423	434.609
77.5599	99.9997	65.4253	69.4304	41.7378	53.9349	59.3891	149.117	107.474	48.858	220.469	201.416	630.576	395.124	69.0468	331.541	580.678	2090.86	472.667	217.262
61.7568	111.053	45.5787	84.2466	69.8683	42.4289	112.055	96.9657	96.3455	61.8821	202.586	340.829	234.266	402.758	156.567	3.38857	1010.55	950.767	735.118	397.132
85.2203	73.4045	57.8352	86.6006	86.1973	65.7603	109.485	79.608	150.227	69.7752	213.147	353.742	344.84	292.444	253.936	16.463	406.581	1549.86	593.655	738.406
82.481	95.6953	70.7629	48.191	68.331	75.4573	86.9286	142.772	165.641	60.0585	323.975	424.8	117.94	581.637	211.258	306.488	1176.56	1902.34	1289.23	543.481
69.2579	94.4046	79.6085	43.9696	84.9026	71.8244	92.3662	89.3599	127.791	90.4234	145.66	666.048	79.7117	554.166	200.953	22.2276	1144.55	1631.48	1209.26	396.356
87.0572	140.445	66.0191	54.8959	69.6682	64.5962	109.048	133.608	130.851	84.2251	227.348	992.144	311.672	471.056	237.252	237.195	627.64	786.321	564.604	253.582
75.1371	49.2418	67.7899	107.477	15.3741	70.7904	104.697	187.457	144.199	105.608	153.128	277.051	90.0313	407.352	203.812	520.321	416.302	318.95	1193.75	206.098
17.9122	203.441	67.0568	40.3242	76.844	106.854	160.341	115.175	247.406	122.171	136.925	280.643	58.0855	821.043	249.402	0.0964867	601.371		1032.14	321.003

## Sheet: adherent-Y27632
Raw data of Young's modulus of adhered HEK293 cells treated with Y27632.
cell-01	cell-02	cell-03	cell-04	cell-05	cell-06	cell-07	cell-08	cell-09	cell-10	cell-11	cell-12	cell-13	cell-14	cell-15	cell-16	cell-17	cell-18	cell-19	cell-20
186.859	85.9258	86.299	44.1676	54.1378	78.596	81.7733	186.002	67.4306	80.5774	148.456	156.681	147.406	29.6017	85.0796	84.0828	373.96	77.0218	66.1913	54.8416
309.12	88.3613	97.7886	74.0529	60.7213	61.8113	60.5034	59.9634	92.2026	131.109	102.44	256.512	87.5218	263.261	72.253	109.502	193.749	142.991	72.5586	304.073
237.223	88.073	94.0277	86.751	20.389	91.5044	77.2902	149.659	137.859	122.517	93.9319	83.7386	141.378	122.552	93.8382	73.9069	357.744	182.983	41.7155	82.3758
141.777	112.814	141.33	46.5249	7.3424	42.9374	96.1447	108.891	97.8417	87.1113	91.934	132.708	50.0924	118.778	87.889	70.332	392.935	605.362	61.8239	274.645
71.9558	130.648	126.287	67.7214	59.8194	41.1824	152.899	85.7744	125.629	81.5734	120.549	72.2601	81.2099	169.198	83.872	77.0982	261.932	247.003	60.3862	235.118
121.417	98.8325	115.814	84.0699	42.0738	89.8601	117.324	232.39	98.4694	105.972	124.25	130.427	68.0418	95.4588	61.6611	77.5136	374.87	228.129	62.9877	79.178
170.266	68.5766	70.6369	92.2627	90.5971	90.3906	56.9438	76.7437	106.857	61.1313	105.261	185.431	76.7488	74.0322	64.5175	156.277	434.604	127.498	97.6843	373.918
221.994	54.5723	145.901	72.4533	107.608	189.636	55.4232	88.546	102.557	72.2624	98.887	119.169	101.763	59.9997	110.645	175.173	335.206	167.049	176.328	240.774
264.289	64.292	76.5643	138.275	124.561	72.6546	139.777	71.3667	85.0702	76.8748	93.4778	87.026	90.4936	37.9248	123.461	327.627	278.308	115.212	195.475	242.423
171.596	93.4422	62.2566	112.142	95.3328	206.106	66.7988	112.61	153.142	99.0254	97.9779	63.3354	85.5901	99.1143	102.189	180.389	152.429	106.834	207.343	372.652
204.78	72.7806	107.513	109.823	101.542	255.449	98.6997	114.544	86.4595	99.5451	71.038	187.488	99.8072	71.1014	155.594	237.916	169.686	141.427	114.737	134.083
212.43	121.254	156.807	132.059	105.472	310.399	119.052	83.4583	140.701	72.4376	61.5933	83.6986	79.3528	70.2917	104.349	193.13	100.399	135.826	160.207	168.724
139.933	115.257	75.5537	72.3298	115.768	231.326	39.5361	65.1284	95.2764	66.34	56.7324	81.0367	52.4271	77.3416	207.111	225.136	215.025	129.859	129.195	145.752
140.213	38.7676	213.594	161.07	104.292	105.665	46.8795	44.9934	83.913	66.8427	72.4417	86.1044	54.0744	76.9604	218.821	198.279	274.52	163.117	113.004	313.419
162.983	66.1218	104.492	90.0607	92.1639	106.372	91.319	374.503	77.1907	74.3716	105.383	109.398	86.0445	258.325	156.312	394.126	189.554	296.002	80.3918	143.777
140.356	36.5405	30.5484	137.099	90.7597	107.626	137.857	174.946	101.74	53.0627	85.8613	89.7558	156.276	178.82	228.056	228.376	184.354	224.185	127.461	422.926
331.649	95.842	105.953	102.575	120.969	293.738	70.972	167.248	57.973	57.9936	94.4443	93.9916	69.8884	97.8705	105.319	155.074	186.768	229.309	60.8742	235.423
199.697	102.244	108.254	92.1452	89.4923	119.654	67.3032	35.3008	100.746	74.8795	109.75	93.5766	86.7412	101.764	123.031	163.175	219.308	304.189	168.137	178.509
260.749	46.9953	205.522	95.5856	69.3919	118.111	64.0049	128.371	177.353	92.1313	88.2678	100.844	107.804	81.8513	133.637	133.048	329.174	44.3982	130.627	166.505
188.196	117.541	132.652	54.4314	70.61	90.3295	55.4168	163.429	100.332	109.169	55.9311	98.731	86.9578	102.859	114.17	121.468	260.577	128.535	234.316	173.135
179.198	66.0538	196.223	159.065	117.136	119.554	64.458	128.143	35.6075	133.455	48.4349	98.2053	91.8692	127.744	106.479	137.101	456.052	146.789	108.6	106.412
247.625	97.478	162.999	78.9636	133.838	309.596	63.6097	100.447	201.586	91.0069	70.305	94.6199	115.043	87.0613	96.7275	214.443	147.841	127.396	199.315	159.822
182.294	51.8012	95.5008	118.572	117.153	149.701	104.873	95.7731	88.2678	97.3098	102.238	101.13	106.72	274.618	147.369	175.109	235.751	147.069	140.345	231.584
190.168	48.2505	77.9542	141.302	113.843	234.716	59.0329	126.389	90.0871	77.1354	61.7539	94.8696	140.166	191.774	38.748	134.534	362.664	300.662	87.9016	157.463
122.551	73.6787	96.2035	127.156	110.854	244.512	135.055	122.187	81.4325	79.8027	152.415	102.892	95.9151	242.865	174.927	81.0183	239.55	231.854	53.5446	200.982

## Sheet: adherent-caly-ctrl
Raw data of Young's modulus of adhered HEK293 cells. This is a control of calyculin A treatment.
cell-01	cell-02	cell-03	cell-04	cell-05	cell-06	cell-07	cell-08	cell-09	cell-10	cell-11	cell-12	cell-13	cell-14	cell-15	cell-16	cell-17	cell-18	cell-19
207.518	124.874	122.007	47.7941	169.261	145.051	278.231	258.294	143.675	127.894	185.883	115.451	185.451	179.949	140.756	85.9959	108.16	106.482	118.705
270.294	96.4151	196.801	95.1042	176.21	153.467	269.293	252.706	121.976	183.96	179.907	179.333	246.673	202.614	149.727	103.621	144.799	134.676	118.277
231.243	97.8641	238.199	75.3855	184.881	136.454	254.633	302.191	127.921	171.968	170.951	173.974	220.789	203.542	113.516	111.3	137.343	139.309	145.967
122.083	97.5065	153.358	98.3989	188.626	112.614	214.297	149.345	104.016	179.878	158.753	172.306	214.149	192.438	131.44	102.559	144.819	118.127	150.843
311.167	98.0864	265.589	105.513	186.938	121.165	241.526	174.828	134.02	159.816	176.334	156.26	222.221	198.739	112.329	101.034	131.022	118.321	143.952
156.751	154.398	223.102	113.88	214.022	175.116	181.805	123.961	94.0018	160.789	190.594	151.015	263.198	246.74	132.444	112.097	135.79	134.664	147.464
106.866	108.24	238.437	102.481	202.027	151.729	240.266	226.168	110.163	162.571	200.011	136.836	245.751	236.751	148.165	123.826	128.185	142.73	160.268
57.7289	79.0951	229.017	91.4179	205.414	126	220.263	185.947	133.646	170.329	195.044	160.4	251.409	194.953	137.449	132.515	137.529	122.411	161.755
89.2056	128.359	215.694	86.6418	183.756	107.86	261.375	163.083	112.649	162.855	189.761	135.103	240.485	249.477	149.087	117.524	137.114	132.55	158.48
382.693	153.303	212.576	87	186.304	128.552	233.495	256.48	167.852	158.637	147.635	143.829	245.719	271.55	199.108	125.962	128.418	134.144	157.471
266.615	109.498	197.618	89.5097	208.81	129.586	237.791	160.892	120.029	160.975	183.602	124.172	229.387	284.465	188.814	119.411	137.066	131.658	167.547
316.376	109.33	208.23	151.657	235.503	158.492	212.911	108.752	174.418	158.485	166.516	131.867	232.393	243.561	204.251	120.171	138.51	135.856	182.098
381.95	122.609	173.758	158.277	236.432	144.048	240.858	179.712	186.531	167.268	160.323	127.684	213.15	248.533	153.489	114.996	143.618	138.495	175.589
369.774	123.083	156.89	167.106	62.8778	161.318	248.201	172.92	187.922	154.491	165.666	164.176	238.797	240.747	150.124	122.35	140.459	131.192	161.094
327.045	127.853	115.597	156.709	72.9813	174.263	263.954	179.246	145.249	165	182.011	142.422	232.506	247.594	103.109	118.897	154.981	141.103	174.302
259.52	142.023	232.5	179.374	76.3329	167.206	208.563	150.912	136.644	162.396	184.396	148.345	276.676	247.734	122.265	139.081	134.641	140.798	160.65
297.562	140.178	87.7952	158.733	84.9996	167.445	237.009	176.559	272.733	162.068	178.328	132.661	256.434	272.289	191.709	145.737	138.275	144.681	173.572
198.708	169.525	200.818	133.049	75.9319	170.867	238.011	252.208	160.64	159.231	161.507	149.612	246.446	237.523	199.623	146.046	139.988	135.142	158.184
241.53	401.462	142.214	132.821	94.4542	117.211	205.879	298.966	148.049	155.079	147.434	155.898	226.297	206.398	138.929	132.921	134.486	136.46	162.538
283.488	176.712	275.833	152.401	82.9156	152.216	114.899	178.539	150.642	157.577	74.7297	137.855	191.59	221.676	120.287	124.666	134.064	148.782	154.46
309.958	153.999	210.461	136.578	90.8593	177.074	170.811	92.7085	198.787	149.199	158.328	145.037	235.213	231.32	210.268	139.12	140.444	143.276	138.48
197.96	195.02	148.192	136.378	121.419	184.358	165.11	194.435	175.154	139.897	147.587	161.22	246.638	217.86	205.249	145.499	129.117	146.145	168.228
231.92	119.663	116.443	157.531	98.1705	150.613	225.051	344.4	181.402	138.01	155.785	154.124	262.786	226.751	140.184	140.864	124.698	146.468	174.335
204.321	206.098	121.259	145.106	98.6278	142.038	267.897	174.736	174.561	138.712	164.337	150.271	214.025	155.751	157.808	139.551	124.324	143.169	160.574
354.853	190.626	143.748	137.286	189.27	191.779	229.971	106.624	166.814	144.245	160.964	152.347	258.6	168.215	161.517	130.054	127.503	138.387	172.747

## Sheet: adherent-calyculin
				Raw data of Young's modulus of adhered HEK293 cells treated with calyculin A.
cell-01	cell-02	cell-03	cell-04	cell-05	cell-06	cell-07	cell-08	cell-09	cell-10	cell-11	cell-12	cell-13	cell-14	cell-15	cell-16	cell-17	cell-18	cell-19	cell-20
754.741	293.176	313.703	226.93	383.727	258.132	129.719	143.393	149.867	149.298	170.73	160.063	195.276	265.585	204.863	302.731	307.329	280.66	387.239	119.125
502.276	291.887	400.142	229.837	561.724	286.296	274.421	372.7	166.9	288.181	233.665	156.959	274.184	311.798	202.556	151.391	363.454	358.738	230.097	160.103
494.822	318.817	349.374	230.224	740.001	310.516	204.106	102.309	181.303	177.597	167.68	157.164	245.903	247.136	176.99	153.76	351.659	288.425	135.026	307.257
458.703	302.765	292.909	226.145	652.645	295.13	231.63	181.97	185.133	171.81	251.469	189.828	237.577	285.806	236.916	89.7898	409.671	259.044	216.329	213.243
391.808	291.45	269.706	211.919	394.896	258.027	226.105	193.062	212.527	268.296	202.341	167.034	303.059	273.674	237.592	136.438	348.156	375.961	133.499	117.884
452.744	346.938	308.967	236.426	447.517	214.808	229.008	200.52	210.875	245.347	198.844	265.855	295	276.786	267.871	434.139	357.164	314.59	172.228	178.645
467.46	313.29	460.015	249.735	397.974	268.096	236.935	189.999	180.706	360.547	214.924	272.25	310.128	242.902	267.055	115.099	425.727	264.227	304.296	239.593
451.937	269.937	481.219	250.419	353.196	212.667	238.511	216.632	171.052	217.453	197.579	290.591	296.632	239.378	298.357	204.03	350.609	404.384	177.713	172.979
538.979	271.139	446.496	239.592	277.415	276.911	236.962	191.002	186.621	177.708	188.946	298.368	261.305	204.834	307.321	213.75	327.474	382.176	180.484	163.525
530.131	269.522	422.873	225.365	474.63	307.492	273.014	195.994	186.326	219.547	205.26	340.104	257.017	172.615	295.645	203.575	349.723	325.174	147.215	247.25
442.268	227.68	406.843	341.362	267.281	344.507	280.088	186.324	218.948	179.397	376.219	319.154	284.957	181.528	289.298	204.107	356.082	403.031	316.742	189.635
530.45	251.98	369.003	343.188	352.624	300.29	257.006	229.828	235.11	161.623	195.271	395.566	297.776	157.447	410.773	209.958	416.436	356.779	285.067	161.513
460.112	272.518	393.829	261.326	337.631	288.19	242.664	242.971	237.711	179.586	193.068	224.355	288.989	181.086	299.144	221.146	374.506	372.873	294.873	314.449
356.02	321.863	366.677	372.226	612.85	167.11	271.802	209.828	239.697	309.287	221.238	414.787	286.711	158.202	303.663	208.957	428.403	295.933	199.415	543.967
355.794	329.185	274.282	353.006	264.962	264.505	275.099	222.85	225.126	254.016	228.296	306.131	296.218	190.635	285.771	223.508	459.866	395.181	212.519	364.658
416.144	273.409	171.084	355.733	263.8	174.319	287.616	253.464	239.008	271.36	194.059	269.73	295.465	186.71	259.35	217.496	561.099	378.225	329.121	365.435
435.452	291.691	285.526	269.128	271.245	293.717	296.924	244.453	219.672	164.048	229.355	432.433	311.089	195.188	256.917	254.316	477.879	168.939	390.976	373.554
443.883	282.157	335.352	319.668	280.187	274.759	295.025	234.161	228.802	279.445	245.085	362.847	315.674	172.661	297.668	201.009	455.641	197.364	375.589	107.414
347.856	245.346	298.153	330.615	491.57	311.635	281.965	255.289	240.649	321.934	251.583	412.298	342.968	136	272.707	241.101	439.205	357.332	301.379	246.72
431.563	259.731	315.704	348.761	270.016	240.403	236.024	249.314	208.068	249.795	240.708	433.505	322.199	171.835	298.872	240.261	367.414	253.411	227.961	372.34
414.718	272.875	317.038	251.527	504.592	293.692	281.669	288.552	204.98	286.29	256.469	546.543	334.726	186.974	269.481	214.285	346.734	284.665	259.663	207.193
440.581	244.472	303.067	358.096	484.465	433.889	229.587	272.851	174.447	359.715	257.453	413.911	341.378	213.173	269.934	207.704	415.216	311.819	324.051	349.158
411.771	311.059	216.911	361.009	406.664	394.543	249.893	296.964	190.432	285.581	298.595	359.855	379.508	182.771	275.419	202.592	439.861	301.437	296.043	451.538
499.859	303.449	251.395	350.175	352.589	430.342	117.715	306.955	208.617	145.884	261.271	277.274	390.284	214.022	246.126	219.071	490.779	390.829	304.807	349.131
405.223	295.771	263.691	378.67	254.35	327.941	288.132	272.495	309.842	224.079	530.979	348.304	361.514	246.696	214.613	244.638	456.731	327.901	312.615	210.811

## Sheet: BAM-Y-ctrl
Raw data of Young's modulus of suspended HEK293 cells. This is a control of Y27632 treatment.
cell-01	cell-02	cell-03	cell-04	cell-05	cell-06	cell-07	cell-08	cell-09	cell-10	cell-11	cell-12	cell-13	cell-14	cell-15	cell-16	cell-17	cell-18	cell-19	cell-20
749.683	1227.22	1107.45	697.109	3646.33	1842.32	564.554	758.38	386.496	489.05	228.131	948.137	3697.48	604.184	708.404	395.983	204.573	428.761	235.555	456.303
732.677	753.265	1417.2	795.527	2117.92	1831.65	1021.46	651.226	423.446	458.35	162.718	1576.02	2908.28	1952.99	646.575	537.066	227.033	677.071	243.872	535.059
551.07	789.679	1114.79	877.652	1031.88	2185.99	950.195	747.044	530.042	456.925	190.558	1425.65	2183.7	1366.4	857.288	632.538	247.803	819.407	217.874	507.585
1035.95	961.875	858.468	1086.01	1005.45	1366.05	1143.49	785.611	504.495	377.115	160.617	1964.98	2843.23	1246.01	721.766	626.798	224.434	586.252	262.591	508.591
2052.12	1150.32	786.889	567.464	1231.49	2215.14	1571.65	544.196	644.051	369.471	192.049	1377.36	3712.68	203.471	663.527	462.201	211.808	717.213	270.453	553.684
1970.3	1250.26	1461.53	538.33	1263.4	2217.47	1808.98	826.003	463.623	533.987	296.233	885.488	3812.42	1298.53	715.293	520.134	216.179	693.399	285.849	680.206
1009.1	949.429	1331.77	557.991	1417.65	1870.21	1713.12	617.101	485.12	521.126	286.72	1098.58	3256.33	1887	663.587	612.601	259.035	604.7	326.552	669.098
629.901	781.888	758.867	517.988	1294.04	1488.79	1832.35	533.955	465.573	506.711	178.114	1710.53	2705.05	1358.79	716.309	694.542	231.646	621.235	331.578	545.527
622.267	2444.63	987.158	607.492	1283.99	1693.79	1989.88	464.69	526.757	586.453	234.114	1018.58	2857.55	1626.67	806.057	665.808	200.38	544.274	344.417	567.672
333.842	991.784	2059.7	564.965	1304.17	1460.74	1894.9	754.701	395.061	673.861	230.235	828.727	3785.18	1194.25	828.618	637.024	212.544	500.355	312.176	740.249
1072.52	1292.99	1378.76	765.154	1804.85	2750.68	1862.05	741.454	401.221	571.005	251.763	1312.46	4122.85	1216.01	673.65	658.44	224.038	691.881	341.866	589.47
665.688	863.346	502.965	642.392	1219.59	2603.15	1926.83	686.472	605.005	651.265	251.256	998.499	2944.72	1594.21	560.283	694.304	239.085	737.21	467.5	597.702
754.54	264.757	1065.78	601.579	895.02	2420.18	2107.92	571.563	395.739	590.226	268.063	900.492	2555.12	1128.19	727.412	630.703	212.347	720.028	362.762	776.535
748.731	547.1	485.611	485.364	999.731	817.245	1717.48	639.654	296.198	516.529	228.615	989.492	3458.38	1068.61	824.423	665.638	224.465	671.438	324.528	809.537
1075.2	459.209	706.572	539.623	942.405	2641.91	1776.87	744.322	245.626	623.75	308.822	1197.06	3114.65	1171.39	1020.07	655.04	228.858	775.6	298.477	649.881
581.27	562.858	1045.81	594.275	1081.71	2065.44	1833.55	774.905	234.338	556.438	207.655	1014.15	2175.29	687.233	959.166	593.556	235.324	708.683	330.541	626.603
817.941	514.115	1072.96	621.009	936.697	2287.82	2108.85	603.019	354.359	539.209	263.378	973.327	2573.93	1145.97	856.435	526.507	246.9	655.677	378.136	964.374
1140.17	720.563	1413.77	827.086	1051.77	1314.61	2792.89	721.212	351.808	239.856	285.749	1049.46	4687.25	1204.09	647.718	665.432	264.229	700.084	393.438	760.762
883.729	813.931	1596.36	541.15	759.819	2082.46	1801.55	476.8	350.735	731.162	322.94	885.227	5082.74	1011.46	823.134	458.592	268.253	748.976	390.722	582.904
1310.39	1037.54	1045.61	879.012	1629.88	2715.36	985.808	562.019	406.131	707.601	289.453	1256.47	6307.65	727.854	853.291	531.671	278.789	757.831	369.07	560.604
863.185	956.553	2065.06	1494.93	1316.02	2114.87	1039.35	678.899	477.524	1179.52	258.189	1279.91	3030.32	1227.43	919.438	545.094	312.116	804.516	417.124	415.914
1056.6	698.262	1313.07	1458.65	1297.39	2753.86	1733.99	499.429	356.869	672.992	277.875	1069.82	5087.72	1046.3	1174.82	463.614	291.203	726.508	363.824	761.576
846.147	451.764	907.509	1470.22	767.934	2375.2	2262.42	472.809	324.71	1347.36	290.71	874.203	5687.21	1468.05	1079.39	514.822	280.833	785.263	305.67	674.591
515.636	1140.36	138.613	1035.05	547.639	2239.68	2499.4	631.626	364.224	990.478	318.505	936.731	4925.32	1202.74	840.257	628.935	253.761	921.009	300.068	737.374
692.299	962.454	832.851	1130.08	398.817	1424.29	2639.86	768.744	273.213	950.6	414.23	938.556	6088.24	514.03	1198.94	599.046	269.37	848.898	362.786	574.62

## Sheet: BAM-Y27632
Raw data of Young's modulus of suspended HEK293 cells treated with Y27632.
cell-01	cell-02	cell-03	cell-04	cell-05	cell-06	cell-07	cell-08	cell-09	cell-10	cell-11	cell-12	cell-13	cell-14	cell-15	cell-16	cell-17	cell-18	cell-19	cell-20
207.165	169.893	279.491	136.888	339.289	98.2083	96.7889	135.88	294.543	191.897	187.477	160.151	132.338	156.93	155.981	137.631	151.541	157.71	289.648	145.802
222.122	209.883	272.593	290.339	377.785	125.417	171.983	140.351	267.593	202.719	182.531	175.824	156.514	187.869	188.908	158.733	208.451	150.568	322.233	203.9
242.326	216.016	312.65	184.976	371.989	133.583	385.126	144.468	305.575	162.322	196.916	205.368	195.089	170.675	179.971	180.765	234.729	232.905	291.202	183.587
247.917	203.31	295.427	187.169	395.878	123.608	141.003	145.451	316.358	171.821	206.22	211.48	175.773	168.527	181.711	162.128	173.486	292.466	311.384	196.297
226.502	187.031	274.166	198.485	425.372	123.345	146.615	125.873	317.311	178.024	204.279	214.776	148.095	207.897	180.897	160.089	204.941	319.466	261.802	198.626
291.459	227.61	265.404	215.034	458.196	139.617	157.994	158.495	340.238	189.396	214.565	273.136	201.416	239.643	201.57	151.141	593.872	289.599	294.848	199.546
314.983	227.098	270.898	216.903	481.119	138.425	173.253	154.859	424.797	200.131	222.392	281.271	203.014	238.487	226.769	207.097	209.956	413.392	322.704	202.7
222.903	236.052	275.048	212.672	501.272	145.912	190.713	162.031	431.53	195.605	215.019	241.595	305.515	257.576	249.123	213.578	203.246	348.358	335.5	212.233
289.855	254.119	263.555	142.854	460.888	168.446	170.036	156.563	443.424	189.279	208.345	211.74	228.732	224.302	204.853	221.444	205.992	319.725	332.15	213.5
382.083	225.18	319.022	169.189	483.154	169.369	187.176	169.541	443.519	224.362	236.872	234.929	221.173	283.977	227.227	225.794	205.078	238.75	333.209	206.846
297.291	238.063	316.148	116.965	534.809	175.565	203.888	167.101	459.306	219.148	233.021	284.381	192.467	359.42	251.747	214.222	194.228	621.383	315.589	232.783
388.205	231.829	284.655	161.616	504.191	169.663	197.385	167.138	478.883	225.984	229.495	249.215	220.471	238.356	250.786	217.243	210.729	231.053	341.633	218.358
258.9	251.869	284.67	199.822	514.085	136.404	202.601	173.43	402.675	234.127	216.874	265.663	239.769	234.841	241.967	221.378	195.225	298.151	336.098	212.984
215.267	245.787	270.992	188.624	455.314	164.566	191.921	161.279	428.87	195.149	225.835	240.375	221.207	235.168	217.32	186.231	196.861	201.854	339.77	223.379
199.611	242.839	251.753	209.308	310.937	224.352	207.852	148.706	413.101	207.019	230.969	239.78	163.014	260.148	180.349	193.208	184.429	210.366	382.462	223.735
290.547	251.84	309.683	270.679	398.812	167.807	205.484	140.367	453.228	232.626	251.036	263.96	194.958	273.66	197.484	201.425	188.926	190.773	340.867	247.579
275.077	269.834	301.633	247.559	450.95	192.186	245.089	155.061	459.736	239.285	249.404	250.39	208.795	278.607	202.984	158.555	193.649	316.604	394.754	239.117
244.409	249.35	335.253	229.155	524.535	206.136	241.296	149.15	416.337	260.579	249.136	273.113	208.029	319.058	196.468	205.256	188.921	298.097	371.892	223.295
256.922	247.345	351.683	165.435	531.902	168.32	220.595	159.297	340.265	274.983	252.61	270.006	212.114	290.867	196.692	233.656	203.353	276.984	321.145	233.14
248.706	276.688	361.395	124.971	513.334	191.926	252.122	157.639	322.807	272.777	232.678	261.369	217.846	273.494	204.191	208.895	164.371	209.074	345.755	235.464
318.351	284.375	418.59	208.909	529.017	188.784	283.899	142.862	384.824	292.424	230.255	297.999	231.813	281.623	201.076	241.979	191.355	208.315	331.285	228.608
288.569	281.197	416.14	210.985	487.843	185.901	283.639	136.452	371.329	279.281	210.483	320.845	231.1	289.928	220.078	244.485	217.618	243.8	239.708	218.502
288.725	260.407	371.142	217.197	508.089	188.719	277.586	224.011	449.895	266.925	249.872	292.63	245.767	282.855	209.913	235.265	203.094	149.05	332.933	229.93
326.81	245.189	319.626	168.591	496.173	169.59	232.199	153.625	453.013	266.351	268.509	287.006	250.215	319.696	227.602	172.732	179.404	221.775	334.612	235.68
384.589	250.622	358.403	151.243	439.028	184.353	228.32	151.183	461.674	292.341	233.873	276.147	173.954	276.759	199.719	185.623	154.759	252.949	304.064	231.235

## Sheet: BAM-caly-ctrl
Raw data of Young's modulus of suspended HEK293 cells. This is a control of calyculin A treatment.
cell-01	cell-02	cell-03	cell-04	cell-05	cell-06	cell-07	cell-08	cell-09	cell-10	cell-11	cell-12	cell-13	cell-14	cell-15	cell-16	cell-17	cell-18	cell-19	cell-20
2356.51	2824.08	678.271	1091.98	3033.08	1742.51	802.768	1616.7	396.706	1930.32	130.17	923.4	398.448	518.708	466.875	376.904	1788.83	369.907	1127.95	539.58
3484.71	2246.68	1885.59	3511.54	2577.61	2541.38	1339.71	1789.19	536.152	2600.9	1384.05	1658.31	578.044	591.185	901.846	515.714	1293.52	421.049	1232.11	1318.22
4649.91	3034.74	2021.73	3776.88	3034.95	2586.47	971.081	1725.58	458.11	1596.26	1417.79	1663.03	542.855	573.925	903.433	383.061	1641.27	454.491	1141	977.663
3526.8	4254.64	2692.1	3068.41	2513.97	2481.22	1074.51	1325.29	511.794	1623.4	1088.91	3332.25	534.556	550.959	716.959	431.539	1201.84	379.006	879.682	962.673
5397.49	3063.45	2577.95	2912.55	2537.5	1739.92	1195.3	863.339	514.395	1195.22	1073.35	1994.82	586.499	570.876	837.971	413.768	1430.55	349.756	1126.27	1076.94
3385.27	2971.57	2290.32	4013	3701.96	1694.02	1202.49	962.463	511.525	970.504	1201.24	1995.2	645.829	477.926	880.245	257.593	1722.44	467.649	1194.21	1003.09
1809.65	5789.23	2738.85	2770.37	2285.01	2106.68	1187.91	1989.58	519.444	1236.8	1594.48	2392.24	603.506	539.496	685.781	396.58	2374.64	278.893	1400.14	1095.46
2245.14	5231.48	2075.55	3654.47	3203.58	2404.78	997.899	2311.84	461.034	1804.72	855.514	2231.69	447.159	534.687	898.211	427.211	1449.79	577.074	1153.77	1175.89
2223.69	4581.2	1570.62	3104.83	2514.8	3162.53	1238.64	2153.97	461.069	1556.79	2285.64	2654.44	563.613	598.761	658.667	472.61	2274.34	451.486	1481.17	1453.8
3032.65	3004.57	1439.1	3679.94	2411.43	1670.07	1144.4	1619.45	548.401	1797.49	2302.88	1502.17	465.199	537.619	1197.93	406.694	1515.55	641.549	1454.35	1267.12
3749.88	3253.14	1854.07	2837.74	2809.06	2025.3	724.303	2182.28	654.981	3079.34	2755.68	2685.41	450.509	394.251	1038.74	379.772	2060.78	846.712	1570.23	1154.66
2109.27	2948.88	2107.88	1366.71	2892.34	1827.65	1238.63	2184.8	658.353	1866.71	3465.39	3511.35	606.189	620.503	865.631	368.839	1970.57	537.771	1412.96	1412.51
1447.66	2661.65	2245.1	2647.32	2510.62	1894.29	1202.4	3205.02	711.906	2932.53	1416.82	2835.62	586.666	656.547	898.684	350.795	1136.7	427.104	1708.53	906.206
2188.21	2294.92	1764.9	3180.13	3074.01	2093.65	1078.01	3102.52	597.001	1445.32	1441.88	2242.22	657.971	633.889	793.375	382.858	1785.09	302.487	1389.38	882.911
3336.77	2388.89	2075.5	3920.34	3589.77	1598.09	1235.41	1067.72	557.423	1424.06	1610.8	1589.58	1153.9	636.551	1101.87	401.272	1340.55	375.647	1116.43	923.156
2605.54	2517.58	1584.35	3201.23	4016.3	2054.02	1587.97	1741.18	577.78	1722.6	1577.77	3099.99	1049.19	596.151	997.068	404.711	1316.12	493.849	1532.33	1223.53
2584.88	2414.45	1967.46	3540.87	3277.89	2890.8	1364.91	2222.31	581.771	1697.3	1145.26	3562.79	1006.67	539.624	1071.32	397.949	1114.29	365.697	1147.27	1075.83
2299.32	2100.91	2241.28	2213.7	2808.18	2410.26	1219.33	1678.73	585.618	1873.22	1234.53	2755.44	521.618	741.73	1001.65	363.233	1549.34	315.342	1389.75	1341.66
2515.73	2843.47	1572.91	2289.6	2144.31	1543.91	1208.39	1593.42	721.655	2144.44	997.618	3754.22	683.866	596.496	1031.9	441.052	1635.67	355.484	1569.51	1371.31
2001.42	2271.53	1534.53	2674.31	2730.88	2630.16	315.336	1818.12	706.913	1604.22	1256.27	3632.97	503.012	650.257	1103.1	437.295	1994.06	278.973	1967.27	1052.59
2351.35	2272.76	1425.05	3496.11	3333.82	2578.52	1566.67	1423.92	769.664	2069.38	1228.06	1959.48	710.62	646.071	930.04	415.358	1635.17	402.117	2440.85	920.304
4620.82	2788.33	2023.79	2315.25	3875.56	2469.24	705.439	913.956	860.148	2358.7	1277.58	3741.47	595.859	670.661	1029.46	381.237	1185.47	311.035	1666.69	1586.56
3314.65	2978.91	2257	2459.05	3066.01	2610.64	1211.49	910.068	799.752	2643.37	1321.68	3708.04	935.064	551.812	1122.51	400.618	1208.63	361.656	1594.28	1366.22
2972.08	2135.66	2160.64	3866.74	3898.62	2358.34	1410.09	1331.82	608.931	2073.32	1394.84	905.144	1350.93	616.525	1240.89	401.657	1248.83	331.814	1404.56	1111.26
1856.86	2661.99	1655.26	3730.19	3677.54	2066.51	1505.36	1562.78	642.01	1456.89	1216.9	3593.48	794.511	546.128	1564.77	397.709	1442.4	322.45	1302.15	1154.48

## Sheet: BAM-calyculin
			Raw data of Young's modulus of suspended HEK293 cells treated with calyculin A.
cell-01	cell-02	cell-03	cell-04	cell-05	cell-06	cell-07	cell-08	cell-09	cell-10	cell-11	cell-12	cell-13	cell-14	cell-15	cell-16	cell-17	cell-18	cell-19	cell-20
1411.27	917.72	1117.93	1332.12	1087.47	992.509	1245.94	719.078	2626.22	1649.77	739.965	1538.64	591.668	2866.66	1994.9	2169.22	3542.41	1046.3	1670.69	1408.77
3144.82	832.859	1314.38	2025.1	1063.38	973.348	905.995	780.55	3233.12	1727.72	1249.49	1791.16	994.242	2482.36	2552.13	2272.7	3202.09	1441.03	1118.03	1835.7
2397.35	2117.59	1608.48	1656.15	2186.28	912.454	903.481	752.615	3813.96	1404.04	1366.8	1650.86	1133.58	3852.53	1827.99	2553.07	2301.33	1218.61	1444.2	2054.42
2196.66	2025.75	1310.41	2327.08	1747.35	871.716	756.124	642.243	3141.49	1249.19	1002.57	1883.25	1178.86	3438.24	1686.64	2373.83	1809.5	1167.71	1030.41	1896.95
2100.12	1736.46	1581.11	1734.79	1297.83	978.859	590.677	668.378	2281.37	1209.71	1460.77	1651.5	1173.41	435.042	927.426	2392.66	1503.42	1278.12	1540.92	2438.31
2474.25	1420.09	1418.3	1271.79	1290.53	715.465	646.769	610.861	5042.06	1114.72	1686.82	1971.5	1017.09	3222.51	1995.95	1719.54	1547.6	827.81	1197.58	1919.46
1175.02	2290.11	1571.39	1672.81	1824.54	745.121	945.989	655.913	6560.79	1259.54	2292.74	1625.64	1180.44	2976.43	2673.94	2706.1	1854.95	1590.59	1627.87	2519.93
1822.7	1936.99	1269.69	2355.06	2131.37	542.08	1260.77	737.222	1569.77	1422.97	2347.34	1655.05	1231.9	3149.5	1719.02	2095.99	2859.25	1487.93	1593.84	2256.59
1613.36	2133.55	1415.06	1930.33	1587.96	836.962	1315.22	643.735	3393.37	1121.6	2865.39	1438.83	1148.46	4092.07	3001.94	1580.16	2718.67	1568.87	1190.84	1957.59
1397.84	2498.09	1455.21	2111.2	1717.67	966.311	1118.54	806.225	3067.95	1510.44	4446.51	951.039	1195.74	2693.99	2001.92	1719.11	1552.68	1658.51	1466.78	1761.01
1604.76	3037.03	1431.64	2376.6	2078.37	1193.97	915.867	799.542	2629.98	1320.44	4378.74	1325.1	1373.56	4048.71	1620.81	1541.16	1937.08	1951.86	1842.06	1920.55
1655.26	3258.09	1526.83	2694.16	1511.85	1279.9	1148.29	715.277	2391.1	1368.69	2797.49	1755.84	1589.68	3079.11	2389.83	1693.21	1972.11	1599.6	1346.44	1698.98
1776.57	2830.95	1470.18	2613.51	1163.11	958.914	1046.64	701.878	3629.83	1357.01	1362.19	1590.73	1274.25	2807.07	2409.84	1770.48	1843.16	1575.53	1355.56	2658.32
1278.44	2024.32	1444.7	2692.8	582.097	855.762	1021.08	535.65	3224.95	1836.69	2034.44	1884.8	1160.83	2797.27	2295.44	1987.55	2288.36	1490.41	1583.35	2811.39
1097.9	1870	1681.07	1667.64	862.74	797.326	1368.71	550.941	1966.92	1803.26	1690.83	2122.73	1283.3	3144.81	1403.96	1754.32	1508.38	1380.92	964.643	3280.56
1095.46	2178.3	1901.74	1420.11	996.401	1192.16	839.917	533.539	2207.59	1902.52	2093.29	1955.63	1172.97	4514.8	1555.77	1706.12	1763.36	1643.52	1410.3	2059.63
1251.64	1880.09	1642.31	2667.74	931	1181.41	1135.57	542.381	2952.52	1925.83	2976.29	1599	1777.58	3409.27	1735.99	1771.57	1951.16	1147.68	1433.31	1813.4
1336.96	1489.03	1527.26	2583.32	887.467	896.83	1264.91	768.519	3497.41	2265.23	2455.54	1837.3	1211.61	3988.43	2390.9	1762.71	2073.67	2119.49	819.453	3109.04
1165.05	2113.68	1174.6	1597.69	881.006	962.983	1161.83	599.886	2285.67	1348.4	1519.62	1486.66	1501.2	3333.65	2069.9	1342.4	1394.05	1806.02	444.247	1842.5
1518.06	1480.05	1225.03	1527.16	943.389	824.366	1510.15	818.41	3039.1	1838.33	1886.72	2078.09	1413.79	4956.34	1892.77	1489.1	1043.59	1849.26	861.593	2071.29
1683.52	1692.46	1430.99	1961.67	1119.54	972.867	910.514	888.868	2019.59	1831.86	3344.09	1633.17	1248.94	5080.56	1345.1	1662.64	1249.31	1752.06	1238.21	2036.11
1199.88	3615.14	1440.59	1818.64	1012.67	994.985	1025.09	607.213	3910.36	1451.16	1447.21	1799.66	1600.89	5045.34	2317.24	1323.37	1273.5	1686.59	1639.73	1589.71
1661.68	3063.61	1344.48	2223.46	1297.13	1595.85	1016.74	669.14	4357.7	1516.67	2013.88	1625.22	1587.04	4508.6	1951.13	1408.54	1831.45	1645.19	970.448	2084.66
1410.81	3338.42	1571.4	1613.34	1095.35	1098	954.571	636.282	2822.7	1597.67	1370.27	1711.15	1370.44	4808.11	1612.4	1434.39	1541.17	1483.12	1306.32	2076.61
1562.89	2829.95	1155.4	1692.05	1078.53	1410.56	914.34	608.5	2625.19	1760.73	1797.22	1577.53	1420.63	3846.98	1719.82	1603.75	1656.82	1255.15	1066.54	1998.05
